# Supplementary material
Source: HighWire-hosted journal article supplement (https://gut.bmj.com/content/69/4/617)
Supplement: inline-supplementary-material-1 [file inline-supplementary-material-1.pdf]

Non-Steroidal Anti-Inflammatory Drug (NSAID) Therapy in Patients with Hypertension, Cardiovascular, Renal, or Gastrointestinal Comorbidities: Joint APAGE / APLAR / APSDE / APSH / APSN / PoA Recommendations

Supplementary Text 1

(A) Methods

The Steering Committee Meeting

The steering committee meeting was organized in Osaka, Japan between April 7th and 8th, 2018. The principal investigator (FKL Chan) called a meeting with an interdisciplinary team from gastroenterology (K Fujimoto, and K Sugano), nephrology (CC Szeto), cardiology (JG Wang), and epidemiology (K Tsoi) to discuss the safety use of NSAID. The clinicians were from the Asia-Pacific Society for Digestive Endoscopy (A-PSDE), the Asia-Pacific Association of Gastroenterology (APAGE), the Asia-Pacific Society for Nephrology (APSN), and the Asia-Pacific Society of Hypertension (APSH). This meeting discussed the structure of the expert panel, focus of the adverse events, presentation format of the positional statements, and plan for academic publication. The steering committee members explored other associations in the Asia-pacific regions and agreed to invite experts in the field of rheumatology. The definitions of adverse events were agreed to focus on the life-threatening events, including the cardiovascular diseases, GI bleeding and renal failure. CC Szeto drafted the proposed position statements based on the evidence from the literature review. Each panel member independently reviewed the draft of statements and proposed modifications in advance of the expert panel meeting.

### The Expert Panel Meeting

The expert panel meeting was organized in Shatin, Hong Kong on Nov 23th, 2018. The expert panel comprised of three cardiologists, three gastroenterologists, three nephrologists, two rheumatologists and an epidemiologist. The clinicians represented six societies or associations in the Asia-pacific regions (Appendix 1). The meeting was chaired by the principal investigator from gastroenterology (F Chan). Panel members received the first draft of positional statements, a summary of the literature reviews, and the full lists of original papers before the meeting. All comments or concerns for the statements were marked on the draft. In the meeting, panel members reviewed the draft of the statements and in individual sections on hypertension, cardiovascular, renal and GI adverse effects. Each statement was discussed for the level of evidence available and the strength of the recommendation by using the classification system of the Grading of Recommendations, Assessment, Development and Evaluations (GRADE) (Supplementary Table 1) [1]. The full list of positional statements was endorsed at the end of meeting.

### (B) Other cardiovascular effects of NSAID

In addition to congestive heart failure and atherosclerotic events, there is also evidence on the association between NSAID and other cardiovascular problems. For example, a meta-analysis found that COX-2 inhibitors are associated with increased risk of cardiac arrhythmia (relative risk 2.90) [2]. Liu et al [3] found that recent prescription of NSAID was associated with new onset atrial fibrillation (relative risk 1.53). Ungprasert et al [4] reported that NSAID is associated with venous thromboembolism (relative risk 1.80). Another systematic review by the same group found that the risk of hemorrhagic stroke is significantly increased for patients treated with diclofenac and meloxicam (relative risk 1.27 for both agents), but not other NSAIDs [5].

### (C) Other renal effects of NSAID

In addition to AKI, some observational studies suggest that NSAID is associated with a higher risk or more rapid renal function loss in CKD [6-8], although other studies revealed negative results [9-11]. It should be noted that chronic use of paracetamol has also been reported to be associated with CKD progression [12,13]. More recently, a meta-analysis of 3 cohort studies, with over 44000 patients, showed that NSAID at high dose, but not regular dose, is associated with more rapid CKD progression [14]. Taken together, it seems logical to avoid chronic use of high dose NSAID in patients with pre-existing CKD, even when there is no acute rise in serum creatinine immediately after the initiation of treatment.

NSAID may also increase the rate of renal function decline without causing AKI in patients with pre-existing CKD. However, 6 observational studies in this area report conflicting result regarding the risk of NSAID on the rate of renal function decline [7-9] and progression to dialysis-dependent ESRD [6-11]. In a case-control study, Kaewput et al [8] found that the rates of eGFR decline were -6.84 and -1.61 ml/min/1.73m<sup>2</sup> in 1 year, respectively, amongst patients with and without COX-2 inhibitor therapy. In contrast, Möller et al [10] reported that the rate of eGFR decline were -0.87 and -0.67 ml/min per year, respectively, amongst patients with and without receiving NSAID. In a meta-analysis of 3 cohort studies with 44,479 patients, high dose NSAID was associated with 26% excess in risk of CKD progression [14].

In addition to the effect on kidney function per se, it is long believed that NSAID may be associated with the development of hyperkalemia. However, a large case-control study of 18326 cases and 355106 controls showed that NSAID may not by themselves carry a higher risk of moderate to severe hyperkalemia [15], and the development of hyperkalemia probably depends on the concurrent exposure to other agents.

#### (D) Other gastrointestinal effects of NSAID

NSAID is also associated with increased risk of various abdominal symptoms [16-19] and lower GI events, which include diverticulosis and its complications (hemorrhage or perforation), and other causes of lower GI bleeding [18-26]. In addition, NSAID usage has been associated with the development of microscopic colitis, a chronic bowel disorder characterized by watery diarrhea. Contrary to its efficacy in peptic ulcer prophylaxis, concomitant use of PPI further increases the risk of microscopic colitis [27]. Acid suppression related gut dysbiosis may contribute to the detrimental effect of PPI [27].

The risk of small intestinal mucosal damage and bleeding is also increased following NSAID [28-30]. NSAID can induce injuries in the small bowel even in patients without any lesions in both the stomach and colon. In a retrospective study of 61 patients who received NSAID therapy and had undergone double-balloon endoscopy because of GI bleeding or anemia, multiple ulcers or erosions were observed in the ileum in 6 patients and in the jejunum in another one [31]. A subsequent study by the Japanese Study Group for Double-Balloon Endoscopy showed that non-specific mucosal breaks were detected in 51% patients who received NSAID treatment, but only 5% in the control group [32]. Symptomatic NSAID-induced small-bowel injuries exhibit a variety of patterns of ulcerative lesions, usually in the ileum but could also be present in the duodenum or jejunum [33]. The pathogenesis of NSAID-induced small bowel injury is not entirely clear. Nonetheless, microbiota probably plays a key role [7,34]. Indole, a gut microbiota-derived metabolite, decreases mucosal inflammation and injury in a murine model of NSAID enteropathy [35]. NSAID results in a drastic alteration in the gut microbiome, which is probably directly responsible for the pathogenesis of small bowel mucosal injury [36]. PPIs *per se* profoundly influence gut microbiota [37] and may further exacerbate NSAID-induced small intestinal injury by inducing dysbiosis [38-40].

In addition to GI complications, NSAID can cause acute liver injury with variable severities [41,42]. The most common pattern of injury was hepatocellular, and auto-antibodies were detected in one-third of the cases [43]. Diclofenac is the most frequently implicated NSAID [44]. A number of genetic factors, including the polymorphism of cytochrome P450 (CYP) enzymes, uridine diphosphate glucuronosyltransferase 2B7 (UGT2B7), glutathione S-transferases (GST) genes, as well as human leukocyte antigen (HLA) alleles, are specifically associated with NSAID-induced liver injury [42]. Although the hepatic safety profile of selective COX-2 inhibitors may be more favorable than traditional NSAIDs, direct head-to-head comparison study is not available [44].

## Reference of Supplementary Text 1

1. Atkins D, Best D, Briss PA, Eccles M, Falck-Ytter Y, Flottorp S, Guyatt GH, Harbour RT, Haugh MC, Henry D, Hill S, Jaeschke R, Leng G, Liberati A, Magrini N, Mason J, Middleton P, Mrukowicz J, O'Connell D, Oxman AD, Phillips B, Schünemann HJ, Edejer T, Varonen H, Vist GE, Williams JW Jr, Zaza S; GRADE Working Group. Grading quality of evidence and strength of recommendations. *BMJ* 2004; 328: 1490.
2. Zhang J, Ding EL, Song Y. Adverse effects of cyclooxygenase 2 inhibitors on renal and arrhythmia events: meta-analysis of randomized trials. *JAMA* 2006; 296: 1619-1632.
3. Bally M, Dendukuri N, Rich B, Nadeau L, Helin-Salmivaara A, Garbe E, Brophy JM. Risk of acute myocardial infarction with NSAIDs in real world use: bayesian meta-analysis of individual patient data. *BMJ* 2017; 357: j1909.
4. Ungprasert P, Srivali N, Wijarnpreecha K, Charoenpong P, Knight EL. Non-steroidal anti-inflammatory drugs and risk of venous thromboembolism: a systematic review and meta-analysis. *Rheumatology (Oxford)* 2015; 54: 736-742.
5. Ungprasert P, Matteson EL, Thongprayoon C. Nonaspirin Nonsteroidal Anti-Inflammatory Drugs and Risk of Hemorrhagic Stroke: A Systematic Review and Meta-Analysis of Observational Studies. *Stroke* 2016; 47: 356-364.
6. Chang YK, Liu JS, Hsu YH, Tarng DC, Hsu CC. Increased Risk of End-Stage Renal Disease (ESRD) Requiring Chronic Dialysis is Associated With Use of Nonsteroidal Anti-Inflammatory Drugs (NSAIDs): Nationwide Case-Crossover Study. *Medicine (Baltimore)* 2015; 94: e1362.
7. Hsu CC, Wang H, Hsu YH, Chuang SY, Huang YW, Chang YK, Liu JS, Hsiung CA, Tsai HJ. Use of Nonsteroidal Anti-Inflammatory Drugs and Risk of Chronic Kidney Disease in Subjects With Hypertension: Nationwide Longitudinal Cohort Study. *Hypertension* 2015; 66: 524-33.
8. Kaewput W, Disorn P, Satirapoj B. Selective cyclooxygenase-2 inhibitor use and progression of renal function in patients with chronic kidney disease: a single-center retrospective cohort study. *International Journal of Nephrology and Renovascular Disease* 2016; 9: 273-278.

9. Ingrasciotta Y, Sultana J, Giorgianni F, Fontana A, Santangelo A, Tari DU, Santoro D, Arcoraci V, Perrotta M, Ibanez L, Trifirò G. Association of individual non-steroidal anti-inflammatory drugs and chronic kidney disease: a population-based case control study. *PLoS One* 2015; 10: e0122899.
10. Moller B, Pruijm M, Adler S, Scherer A, Villiger PM, Finckh A; Swiss Clinical Quality Management in Rheumatic Diseases (SCQM) Foundation, CH-8048 Zurich, Switzerland. Chronic NSAID use and long-term decline of renal function in a prospective rheumatoid arthritis cohort study. *Ann Rheum Dis* 2015; 74: 718-723.
11. Nderitu P, Doos L, Strauss VY, Lambie M, Davies SJ, Kadam UT. Analgesia dose prescribing and estimated glomerular filtration rate decline: a general practice database linkage cohort study. *BMJ Open* 2014; 4: e005581.
12. Perneger TV, Whelton PK, Klag MJ. Risk of kidney failure associated with the use of acetaminophen, aspirin, and nonsteroidal antiinflammatory drugs. *N Engl J Med* 1994 Dec 22; 331: 1675-1679.
13. Ford CM, Ejerblad E, Lindblad P, Fryzek JP, Dickman PW, Signorello LB, Lipworth L, Elinder CG, Blot WJ, McLaughlin JK, Zack MM, Nyrén O. Acetaminophen, aspirin, and chronic renal failure. *N Engl J Med* 2001 Dec 20; 345: 1801-1808.
14. Nderitu P, Doos L, Jones PW, Davies SJ, Kadam UT. Non-steroidal anti-inflammatory drugs and chronic kidney disease progression: a systematic review. *Fam Pract* 2013; 30: 247-255.
15. Lafrance JP, Miller DR. Dispensed selective and nonselective nonsteroidal anti-inflammatory drugs and the risk of moderate to severe hyperkalemia: a nested case-control study. *Am J Kidney Dis* 2012; 60: 82-89.
16. Cryer BL, Sostek MB, Fort JG, Svensson O, Hwang C, Hochberg MC. A fixed-dose combination of naproxen and esomeprazole magnesium has comparable upper gastrointestinal tolerability to celecoxib in patients with osteoarthritis of the knee: results from two randomized, parallel-group, placebo-controlled trials. *Ann Med* 2011; 43: 594-605.

17. Essex MN, O'Connell MA, Behar R, Bao W. Efficacy and safety of nonsteroidal anti-inflammatory drugs in Asian patients with knee osteoarthritis: summary of a randomized, placebo-controlled study. *Int J Rheum Dis* 2016; 19: 262-270.
18. Lubis A, Wang W, Lima G, Fayyad R, Walker C. Comparing the Safety and Efficacy of Celecoxib for the Treatment of Osteoarthritis in Asian and non-Asian Populations: An Analysis of Data from Two Randomized, Double-blind, Placebo-controlled, Active-comparator Trials. *Pain Ther* 2017; 6: 235-242.
19. Deeks JJ, Smith LA, Bradley MD. Efficacy, tolerability, and upper gastrointestinal safety of celecoxib for treatment of osteoarthritis and rheumatoid arthritis: systematic review of randomised controlled trials. *BMJ* 2002; 325: 619.
20. Puljak L, Marin A, Vrdoljak D, Markotic F, Utrobicic A, Tugwell P. Celecoxib for osteoarthritis. *Cochrane Database Syst Rev* 2017; 5: CD009865.
21. Lanas A, Boers M, Nuevo J. Gastrointestinal events in at-risk patients starting non-steroidal anti-inflammatory drugs (NSAIDs) for rheumatic diseases: the EVIDENCE study of European routine practice. *Ann Rheum Dis* 2015; 74: 675-681.
22. Nagata N, Niikura R, Aoki T, Shimbo T, Kishida Y, Sekine K, Tanaka S, Watanabe K, Sakurai T, Yokoi C, Akiyama J, Yanase M, Mizokami M, Uemura N. Colonic diverticular hemorrhage associated with the use of nonsteroidal anti-inflammatory drugs, low-dose aspirin, antiplatelet drugs, and dual therapy. *J Gastroenterol Hepatol* 2014; 29: 1786-1793.
23. Singh G, Ramey DR, Morfeld D, Shi H, Hatoum HT, Fries JF. Gastrointestinal tract complications of nonsteroidal anti-inflammatory drug treatment in rheumatoid arthritis. A prospective observational cohort study. *Arch Intern Med* 1996; 156: 1530-6.
24. Strate LL, Liu YL, Huang ES, Giovannucci EL, Chan AT. Use of Aspirin or Nonsteroidal Anti-inflammatory Drugs Increases Risk for Diverticulitis and Diverticular Bleeding. *Gastroenterology* 2011; 140: 1427-1433.



25. Kvasnovsky CL, Papagrigoriadis S, Bjarnason I. Increased diverticular complications with nonsteroidal anti-inflammatory drugs and other medications: a systematic review and meta-analysis. *Colorectal Dis* 2014; 16: O189-196.
26. Laine L, Smith R, Min K, Chen C, Dubois RW. Systematic review: the lower gastrointestinal adverse effects of non-steroidal anti-inflammatory drugs. *Aliment Pharmacol Ther* 2006; 24: 751-767.
27. Verhaegh BP, de Vries F, Masclee AA, Keshavarzian A, de Boer A, Souverein PC, Pierik MJ, Jonkers DM. High risk of drug-induced microscopic colitis with concomitant use of NSAIDs and proton pump inhibitors. *Aliment Pharmacol Ther* 2016; 43: 1004-1013.
28. Tachecí I, Bradna P, Douda T, Baštecká D, Kopáčková M, Rejchrt S, Lutonský M, Soukup T, Bureš J. Small intestinal injury in NSAID users suffering from rheumatoid arthritis or osteoarthritis. *Rheumatol Int* 2016; 36: 1557-1561.
29. Ishihara M, Ohmiya N, Nakamura M, Funasaka K, Miyahara R, Ohno E, Kawashima H, Itoh A, Hirooka Y, Watanabe O, Ando T, Goto H. Risk factors of symptomatic NSAID-induced small intestinal injury and diaphragm disease. *Aliment Pharmacol Ther* 2014; 40: 538-547.
30. Graham DY, Opekun AR, Willingham FF, Qureshi WA. Visible small-intestinal mucosal injury in chronic NSAID users. *Clin Gastroenterol Hepatol* 2005; 3: 55-59.
31. Hayashi Y, Yamamoto H, Kita H, Sunada K, Sato H, Yano T, Iwamoto M, Sekine Y, Miyata T, Kuno A, Iwaki T, Kawamura Y, Ajibe H, Ido K, Sugano K. Non-steroidal anti-inflammatory drug-induced small bowel injuries identified by double-balloon endoscopy. *World J Gastroenterol* 2005; 11: 4861-4864.
32. Matsumoto T, Kudo T, Esaki M, Yano T, Yamamoto H, Sakamoto C, Goto H, Nakase H, Tanaka S, Matsui T, Sugano K, Iida M. Prevalence of non-steroidal anti-inflammatory drug-induced enteropathy determined by double-balloon endoscopy: a Japanese multicenter study. *Scand J Gastroenterol* 2008; 43: 490-496.
33. Hayashi Y, Yamamoto H, Taguchi H, Sunada K, Miyata T, Yano T, Arashiro M, Sugano K. Nonsteroidal anti-inflammatory drug-induced small-bowel lesions identified by double-balloon

- endoscopy: endoscopic features of the lesions and endoscopic treatments for diaphragm disease. *J Gastroenterol* 2009; 44 Suppl 19: 57-63.
34. Otani K, Tanigawa T, Watanabe T, Shimada S, Nadatani Y, Nagami Y, Tanaka F, Kamata N, Yamagami H, Shiba M, Tominaga K, Fujiwara Y, Arakawa T. Microbiota Plays a Key Role in Non-Steroidal Anti-Inflammatory Drug-Induced Small Intestinal Damage. *Digestion* 2017; 95: 22-28.
  35. Whitfield-Cargile CM, Cohen ND, Chapkin RS, Weeks BR, Davidson LA, Goldsby JS, Hunt CL, Steinmeyer SH, Menon R, Suchodolski JS, Jayaraman A, Alaniz RC. The microbiota-derived metabolite indole decreases mucosal inflammation and injury in a murine model of NSAID enteropathy. *Gut Microbes* 2016; 7: 246-261.
  36. Syer SD, Wallace JL. Environmental and NSAID-enteropathy: dysbiosis as a common factor. *Curr Gastroenterol Rep* 2014; 16: 377.
  37. Maier L, Pruteanu M, Kuhn M, Zeller G, Telzerow A, Anderson EE, Brochado AR, Fernandez KC, Dose H, Mori H, Patil KR, Bork P, Typas A. Extensive impact of non-antibiotic drugs on human gut bacteria. *Nature* 2018; 555: 623-628.
  38. Thompson R. Gastrointestinal bleeding: PPIs shown to exacerbate NSAID injury in rats through dysbiosis. *Nat Rev Gastroenterol Hepatol* 2011; 8: 475.
  39. Wallace JL, Syer S, Denou E, de Palma G, Vong L, McKnight W, Jury J, Bolla M, Bercik P, Collins SM, Verdu E, Ongini E. Proton pump inhibitors exacerbate NSAID-induced small intestinal injury by inducing dysbiosis. *Gastroenterology* 2011; 141: 1314-1322.
  40. Tai FWD, McAlindon ME. NSAIDs and the small bowel. *Curr Opin Gastroenterol* 2018; 34: 175-182.
  41. Meunier L, Larrey D. Recent Advances in Hepatotoxicity of Non Steroidal Anti-Inflammatory Drugs. *Ann Hepatol* 2018; 17: 187-191.
  42. Agúndez JA, Lucena MI, Martínez C, Andrade RJ, Blanca M, Ayuso P, García-Martín E. Assessment of nonsteroidal anti-inflammatory drug-induced hepatotoxicity. *Expert Opin Drug Metab Toxicol* 2011; 7: 817-828.

43. Schmeltzer PA, Kosinski AS, Kleiner DE, Hoofnagle JH, Stolz A, Fontana RJ, Russo MW; Drug-Induced Liver Injury Network (DILIN). Liver injury from nonsteroidal anti-inflammatory drugs in the United States. *Liver Int* 2016; 36: 603-609.
44. Bessone F, Hernandez N, Roma MG, Ridruejo E, Mendizabal M, Medina-Cáliz I, Robles-Díaz M, Lucena MI, Andrade RJ. Hepatotoxicity induced by coxibs: how concerned should we be? *Expert Opin Drug Saf* 2016; 15: 1463-1475.
